# Supplementary material for: Comprehensive Analysis of the Effect of 20(R)-Ginsenoside Rg3 on Stroke Recovery in Rats via the Integrative miRNA–mRNA Regulatory Network
Source: MDPI journal article supplement (doi:10.3390/molecules27051573), 2022-02-27
Supplement: s1 [file s1]

## Supplementary Materials

# Comprehensive Analysis of the Effect of 20(R)-Ginsenoside Rg3 on Stroke Recovery in Rats via the Integrative miRNA–mRNA Regulatory Network

Rui Zhang <sup>1,†</sup>, De-Yun Chen <sup>2,†</sup>, Xing-Wei Luo <sup>1</sup>, Yuan Yang <sup>1</sup>, Xiao-Chao Zhang <sup>1</sup>, Ren-Hua Yang <sup>1</sup>, Peng Chen <sup>1,\*</sup>, Zhi-Qiang Shen <sup>1,\*</sup> and Bo He <sup>1,\*</sup>

<sup>1</sup> School of Pharmaceutical Sciences and Yunnan Key Laboratory of Pharmacology for Natural Products, Kunming Medical University, Kunming 650500, China; dtyz395zr@sina.cn (R.Z.); xingweiluo@aliyun.com (X.L.); yangyuanmail2@163.com (Y.Y.); 15887818479@139.com (X.-C.Z.); yangrenhua@kmmu.edu.cn (R.-H.Y.)

<sup>2</sup> Faculty of Food, Drugs and Health, Yunnan Vocational and Technical College of Agriculture, Kunming 650212, China; deyunchen@aliyun.com

\* Correspondence: chenpeng@kmmu.edu.cn (P.C.); shzhq21cn@aliyun.com (Z.-Q.S.); hebo@kmmu.edu.cn (B.H.)

† These authors contributed equally to this work.

**Table S1.** The primers were used for real-time quantitative PCR.

| miRNA name      | Primer sequence                                       | Base number |
|-----------------|-------------------------------------------------------|-------------|
| rno-miR-19a-3p  | TGTGCAAATCTATGCAAACTGA                                | 23          |
| rno-miR-147     | GTGTGCGGAAATGCTTCTGCTA                                | 22          |
| rno-miR-674-3p  | CACAGCTCCCATCTCAGAACAA                                | 22          |
| rno-miR-671     | TCCGGTTCTCAGGGCTCCACC                                 | 21          |
| rno-miR-21a-5p  | TAGCTTATCAGACTGATGTTGA                                | 22          |
| rno-miR-130b-5p | ACTCTTTCCCTGTTGCACTACT                                | 22          |
| U6              | TGACACGCAAATTCGTGAAGCGT                               | 23          |
| Gfap            | F: GATGTAGGAGTGGGTAGGGC<br>R: CCCTCTCCGCATCCATACTT    | 20<br>20    |
| Tgfb1           | F: CCCTACATTTGGAGCCTGGA<br>R: CGCACGATCATGTTGGACAA    | 20<br>20    |
| Cd44            | F: GCTCTGATTCTTGCCGTCTG<br>R: CGGAGTCTCTGTTGGTTCCT    | 20<br>20    |
| Pfkfb3          | F: CAACTCCCCAACGGTGATTG<br>R: TTTTCGGACTCTCATGGCCT    | 20<br>20    |
| Serping1        | F: AACGAGTCCTTCATCCAGCA<br>R: AGGCGTGGTAGAGTTTCACA    | 20<br>20    |
| C1qb            | F: ACTACTTCACCTACCACGCC<br>R: AGCTTCAAGACTACCCACC     | 20<br>20    |
| GAPDH           | F: GGCACAGTCAAGGCTGAGAATG<br>R: ATGGTGGTGAAGACGCCAGTA | 22<br>21    |

**Table S2.** Differentially expressed mRNAs associated with the effect of 20(R)-ginsenoside Rg3 on stroke recovery.

| Transcript_ID       | Symbol   | Sham     | Model    | Rg3      | log2FoldChange |              | Pvalue        |              |
|---------------------|----------|----------|----------|----------|----------------|--------------|---------------|--------------|
|                     |          |          |          |          | Sham_vs_Model  | Model_vs_Rg3 | Sham_vs_Model | Model_vs_Rg3 |
| ENSRNOG00000000017  | Steap1   | 0.429068 | 1.784127 | 0.224535 | -2.421794094   | 3.072571238  | 0.009181827   | 0.000991443  |
| ENSRNOG000000000137 | Ly86     | 1.232169 | 5.039591 | 2.132352 | -2.378597919   | 1.315758531  | 4.57E-13      | 1.43E-05     |
| ENSRNOG000000000158 | Cdo1     | 26.84255 | 76.34528 | 29.75808 | -1.864560565   | 1.447373263  | 1.45E-05      | 0.000606417  |
| ENSRNOG000000000187 | Csf2rb   | 0.313088 | 15.30918 | 0.530901 | -5.97767412    | 4.946077342  | 3.19E-13      | 1.43E-10     |
| ENSRNOG000000000239 | Ccl7     | 0        | 35.7736  | 0.142486 | -14.27900972   | 7.178743827  | 5.88E-11      | 6.01E-07     |
| ENSRNOG000000000394 | Srgn     | 4.546667 | 30.31629 | 7.68173  | -3.114438999   | 2.073277924  | 1.64E-07      | 0.000553965  |
| ENSRNOG000000000655 | Ptpcr    | 1.073367 | 3.003609 | 1.20189  | -1.764179073   | 1.394332018  | 1.67E-05      | 0.001046253  |
| ENSRNOG000000000902 | Hsph1    | 82.80933 | 163.2173 | 76.37713 | -1.326273169   | 1.173658635  | 3.48E-06      | 3.26E-05     |
| ENSRNOG000000000907 | Alox5ap  | 1.197832 | 8.438242 | 3.256285 | -3.175981673   | 1.458969505  | 4.68E-11      | 0.000475038  |
| ENSRNOG000000000991 | Arpc1b   | 5.052203 | 61.66863 | 13.94233 | -3.968630844   | 2.236866789  | 2.76E-17      | 2.76E-07     |
| ENSRNOG000000001006 | Nptx2    | 23.31372 | 138.2795 | 17.50688 | -2.950604009   | 3.087976406  | 7.92E-05      | 3.54E-05     |
| ENSRNOG000000001149 | Pxn      | 4.822803 | 14.93721 | 6.10581  | -1.993397442   | 1.375072189  | 4.09E-07      | 0.000401535  |
| ENSRNOG000000001193 | Hsf2bp   | 0.102836 | 1.387968 | 0.175755 | -4.093369164   | 3.347331829  | 1.53E-06      | 6.74E-05     |
| ENSRNOG000000001224 | Itgb2    | 1.861968 | 11.77823 | 2.269444 | -3.021607426   | 2.469642893  | 1.16E-10      | 5.11E-08     |
| ENSRNOG000000001309 | Camkk2   | 48.34836 | 15.30151 | 42.80773 | 1.347380101    | -1.436165602 | 0.000555595   | 0.00011442   |
| ENSRNOG000000001414 | Serpine1 | 0.242596 | 54.39652 | 0.415769 | -8.162878645   | 7.135604143  | 1.63E-10      | 5.46E-09     |
| ENSRNOG000000001607 | Adamts1  | 2.361868 | 15.74226 | 1.365513 | -3.104534847   | 3.627522086  | 5.34E-05      | 3.19E-06     |
| ENSRNOG000000001704 | Runx1    | 0.342472 | 1.757087 | 0.70417  | -2.661493433   | 1.461427969  | 3.09E-08      | 0.000308833  |
| ENSRNOG000000001794 | Muc13    | 0        | 0.111326 | 0        | -9.388811743   | 9.546790475  | 0.000338951   | 0.000201012  |
| ENSRNOG000000001959 | Mx1      | 0.307502 | 3.211327 | 0.478041 | -3.746093536   | 2.832536073  | 1.84E-08      | 1.90E-05     |
| ENSRNOG000000002045 | Anxa3    | 8.823098 | 32.55113 | 15.53368 | -2.231228325   | 1.152321121  | 2.93E-12      | 0.00015807   |
| ENSRNOG000000002159 | Gpat3    | 1.703766 | 6.9808   | 1.311162 | -2.403605532   | 2.513484337  | 6.88E-05      | 2.91E-05     |
| ENSRNOG000000002164 | Nmu      | 0.284093 | 6.758432 | 0.354774 | -4.93515767    | 4.380307349  | 0.001375005   | 2.94E-08     |
| ENSRNOG000000002187 | Ropn1    | 0.097778 | 0        | 0.027781 | 10.19558773    | -8.807737952 | 2.79E-05      | 0.000451122  |

|                    |           |          |          |          |              |             |             |             |
|--------------------|-----------|----------|----------|----------|--------------|-------------|-------------|-------------|
| ENSRNOG00000002312 | Atp10d    | 1.644597 | 3.111557 | 1.176593 | -1.335203553 | 1.486828774 | 0.003056475 | 0.000893982 |
| ENSRNOG00000002434 | Tmem100   | 6.580228 | 11.49184 | 7.646341 | -1.865333527 | 1.625226761 | 0.000131046 | 0.000492063 |
| ENSRNOG00000002460 | Serpinb2  | 0.038321 | 1.708931 | 0.004773 | -5.810317005 | 8.481129691 | 0.003783418 | 8.89E-06    |
| ENSRNOG00000002520 | Litaf     | 12.23913 | 29.95299 | 8.975808 | -1.655353894 | 1.831479729 | 0.000105191 | 1.82E-05    |
| ENSRNOG00000002525 | Ptgs2     | 6.95273  | 21.82997 | 5.805893 | -2.014473587 | 2.009948051 | 0.001142879 | 0.000989115 |
| ENSRNOG00000002657 | Pla2g4a   | 1.824737 | 4.575885 | 1.832147 | -1.680540877 | 1.405382658 | 4.45E-05    | 0.000393279 |
| ENSRNOG00000002771 | Ereg      | 0        | 0.255882 | 0        | -10.98935499 | 11.14749014 | 0.000331395 | 0.000192558 |
| ENSRNOG00000002792 | Cxcl2     | 0        | 7.126827 | 0.022406 | -12.88632689 | 8.174397199 | 6.20E-08    | 7.53E-06    |
| ENSRNOG00000002802 | Cxcl1     | 0.01265  | 8.096651 | 0.128136 | -9.517208495 | 6.02280512  | 1.24E-06    | 4.93E-05    |
| ENSRNOG00000002810 | Gfpt2     | 0.895272 | 4.843365 | 1.69201  | -2.789596777 | 1.789155144 | 5.41E-08    | 0.00012034  |
| ENSRNOG00000002919 | Gfap      | 151.1962 | 1523.055 | 283.4966 | -3.709986039 | 2.501480198 | 3.78E-28    | 1.71E-09    |
| ENSRNOG00000002926 | Uap1      | 9.56001  | 42.24005 | 9.161844 | -2.506055621 | 2.300293439 | 1.62E-05    | 6.32E-05    |
| ENSRNOG00000002946 | Socs3     | 0.686878 | 36.23868 | 1.159759 | -6.076203366 | 5.055520284 | 7.30E-07    | 7.97E-07    |
| ENSRNOG00000003069 | Cd38      | 4.223536 | 8.158848 | 3.560554 | -1.298822385 | 1.273086827 | 0.000165627 | 5.24E-05    |
| ENSRNOG00000003088 | Arhgap31  | 4.986322 | 10.83671 | 4.462438 | -1.477884158 | 1.368621512 | 0.000257152 | 0.000769081 |
| ENSRNOG00000003289 | Lap3      | 19.96464 | 40.24178 | 20.8051  | -1.361540647 | 1.032499884 | 1.09E-05    | 0.000601343 |
| ENSRNOG00000003546 | Tnfrsf12a | 1.54574  | 36.12768 | 1.197726 | -4.901307629 | 4.993674518 | 6.61E-07    | 2.81E-07    |
| ENSRNOG00000003703 | Mcm6      | 1.594028 | 7.224993 | 2.096649 | -2.535364539 | 1.866987657 | 1.46E-08    | 4.43E-06    |
| ENSRNOG00000003745 | Atf3      | 0.72741  | 16.85721 | 0.233215 | -4.419890893 | 6.086742572 | 3.27E-05    | 6.72E-10    |
| ENSRNOG00000003809 | Sat1      | 39.73848 | 102.7199 | 46.82588 | -1.727982147 | 1.217847361 | 4.74E-06    | 0.00051322  |
| ENSRNOG00000003895 | Rgs1      | 0.716144 | 8.475764 | 0.334065 | -3.92247434  | 4.752415674 | 0.000130394 | 6.23E-06    |
| ENSRNOG00000003927 | Cd55      | 0.651528 | 4.886055 | 0.723666 | -3.265562477 | 2.843741874 | 3.27E-05    | 0.000176783 |
| ENSRNOG00000003975 | Pfn1      | 64.08555 | 256.3443 | 127.5924 | -2.352629012 | 1.092096839 | 3.86E-11    | 0.000995562 |
| ENSRNOG00000004111 | Soat1     | 5.775607 | 12.4517  | 5.585765 | -1.458191218 | 1.2398918   | 5.15E-05    | 0.000412348 |
| ENSRNOG00000004117 | Kcnv1     | 29.49323 | 7.705843 | 20.74791 | 1.610592887  | -1.36940233 | 5.95E-05    | 0.000505845 |
| ENSRNOG00000004179 | Nts       | 4.67693  | 15.0094  | 3.278222 | -2.054767379 | 2.275075361 | 0.003053021 | 0.000149165 |
| ENSRNOG00000004380 | Il12b     | 0        | 0.36003  | 0        | -10.79560309 | 10.95372825 | 1.33E-05    | 5.94E-06    |
| ENSRNOG00000004500 | Myc       | 0.64714  | 12.93399 | 2.031631 | -5.33926615  | 2.997005046 | 1.79E-08    | 0.000124728 |
| ENSRNOG00000004603 | Srgap1    | 2.418244 | 5.52681  | 2.461999 | -1.550273017 | 1.250331376 | 2.65E-05    | 0.000604501 |
| ENSRNOG00000004649 | Il1b      | 0.039773 | 3.09928  | 0.243444 | -6.622528751 | 3.756607928 | 2.64E-05    | 0.000818316 |
| ENSRNOG00000004883 | Erh       | 18.41192 | 13.83161 | 6.463222 | -1.145737973 | 1.309542091 | 0.009077511 | 0.000794817 |
| ENSRNOG00000005206 | Kcnq3     | 38.44308 | 9.708984 | 18.55369 | 1.549992827  | -1.30330194 | 3.84E-07    | 0.000747666 |
| ENSRNOG00000005214 | Plek      | 3.204843 | 16.29563 | 7.059565 | -2.577473144 | 1.230854126 | 1.73E-14    | 0.000196964 |

|                    |                |          |          |          |              |              |             |             |
|--------------------|----------------|----------|----------|----------|--------------|--------------|-------------|-------------|
| ENSRNOG00000005424 | Odc1           | 21.14244 | 68.10707 | 22.66417 | -1.947329475 | 1.653626721  | 4.02E-05    | 0.000357256 |
| ENSRNOG00000005620 | Lcp2           | 1.051708 | 4.035488 | 1.545097 | -2.291400144 | 1.470253475  | 1.02E-07    | 0.000274299 |
| ENSRNOG00000005731 | Birc3          | 0.25099  | 2.971655 | 0.263571 | -3.921906921 | 3.590703179  | 3.55E-06    | 1.01E-05    |
| ENSRNOG00000005809 | Arhgdib        | 5.427036 | 28.60651 | 11.6006  | -2.744143721 | 1.380964639  | 1.94E-17    | 1.34E-05    |
| ENSRNOG00000005825 | Lyz2           | 34.46258 | 143.2088 | 56.46497 | -2.414922176 | 1.436972384  | 1.71E-08    | 0.001029746 |
| ENSRNOG00000005871 | Il1rn          | 0.19537  | 11.60404 | 0.275527 | -6.251642261 | 5.491539521  | 2.24E-08    | 3.80E-08    |
| ENSRNOG00000005935 | A3galt2        | 1.435943 | 13.25028 | 1.832479 | -3.573760823 | 2.951541939  | 1.51E-07    | 5.01E-06    |
| ENSRNOG00000006094 | Cd44           | 2.305289 | 47.48718 | 3.778554 | -4.39689286  | 3.51870942   | 9.98E-13    | 4.00E-09    |
| ENSRNOG00000006320 | Ptges          | 0.466412 | 15.59912 | 1.375214 | -5.422762173 | 3.605174266  | 1.59E-10    | 7.63E-06    |
| ENSRNOG00000006778 | Mmp19          | 0.225899 | 6.895472 | 1.660327 | -5.278495438 | 2.143735814  | 1.18E-10    | 0.001034349 |
| ENSRNOG00000006828 | Baz1a          | 0.926814 | 2.95615  | 0.78835  | -2.039058598 | 1.997675595  | 0.000143187 | 0.000116239 |
| ENSRNOG00000006921 | Rbl1           | 0.909115 | 1.707285 | 0.62272  | -1.255631823 | 1.527991758  | 0.005198757 | 0.000652937 |
| ENSRNOG00000006932 | AABR07029272.1 | 1.211117 | 3.249365 | 1.507332 | -1.765504569 | 1.186775573  | 1.61E-07    | 0.000197802 |
| ENSRNOG00000006940 | Ncf4           | 0.181209 | 10.35197 | 0.834577 | -6.202792097 | 3.73154638   | 9.32E-16    | 1.80E-09    |
| ENSRNOG00000007002 | Lif            | 0.104917 | 6.312887 | 0.09306  | -5.625536967 | 5.544946454  | 7.75E-06    | 5.29E-06    |
| ENSRNOG00000007060 | Plin2          | 2.571133 | 43.93683 | 3.480342 | -4.46288371  | 3.759296489  | 1.07E-11    | 3.86E-09    |
| ENSRNOG00000007062 | Rin3           | 0.699158 | 4.531037 | 1.827067 | -3.034767089 | 1.391063369  | 6.42E-16    | 0.000128964 |
| ENSRNOG00000007081 | Xdh            | 1.041399 | 2.839296 | 0.664442 | -1.805765479 | 2.189180878  | 0.00035234  | 2.07E-05    |
| ENSRNOG00000007089 | Lgmn           | 26.94112 | 90.45934 | 36.96527 | -2.103414782 | 1.378594723  | 8.97E-10    | 4.22E-05    |
| ENSRNOG00000007142 | B3gat1         | 41.68238 | 13.31428 | 30.67071 | 1.327413642  | -1.150254193 | 0.000141203 | 0.000858245 |
| ENSRNOG00000007159 | Ccl2           | 0.070712 | 108.8863 | 0.256009 | -10.91025716 | 8.832963281  | 6.51E-08    | 8.82E-10    |
| ENSRNOG00000007281 | Flnc           | 3.225038 | 19.2149  | 3.955228 | -2.954761318 | 2.387231403  | 1.88E-08    | 4.69E-06    |
| ENSRNOG00000007302 | Fbn1           | 1.187807 | 9.028156 | 1.734139 | -3.282625853 | 2.47088051   | 2.10E-08    | 2.27E-05    |
| ENSRNOG00000007338 | Fbln2          | 4.173384 | 9.354309 | 2.564034 | -1.535255671 | 1.957739996  | 0.006200806 | 0.000417984 |
| ENSRNOG00000007350 | Rac2           | 1.216867 | 13.81997 | 3.497611 | -3.862171631 | 2.069088378  | 9.06E-14    | 1.39E-06    |
| ENSRNOG00000007390 | Nfkbia         | 14.66626 | 55.74839 | 12.14227 | -2.282722482 | 2.292788783  | 1.29E-05    | 5.52E-06    |
| ENSRNOG00000007457 | Serping1       | 1.387886 | 49.53224 | 18.28385 | -5.500408439 | 1.522308571  | 1.89E-27    | 0.000235617 |
| ENSRNOG00000007545 | Angptl4        | 3.525753 | 16.19055 | 2.68071  | -2.559834383 | 2.686313162  | 2.24E-05    | 6.24E-06    |
| ENSRNOG00000007584 | Ehd4           | 5.410751 | 13.53845 | 5.484175 | -1.676091901 | 1.392329412  | 1.81E-05    | 0.000174187 |
| ENSRNOG00000007650 | Cd63           | 34.33716 | 277.7813 | 84.71673 | -3.380736368 | 1.803296748  | 3.42E-16    | 3.71E-06    |
| ENSRNOG00000007679 | Cyth4          | 4.162606 | 10.77297 | 4.903011 | -1.734608292 | 1.21721771   | 7.50E-06    | 0.000913094 |
| ENSRNOG00000007682 | Gria3          | 80.43405 | 16.27382 | 36.3314  | 1.983002697  | -1.103288743 | 1.07E-10    | 0.000262111 |
| ENSRNOG00000007918 | Tbxas1         | 0.661158 | 4.196023 | 1.254406 | -3.02016419  | 1.829301501  | 1.16E-16    | 2.53E-07    |

|                    |                |          |          |          |              |              |             |             |
|--------------------|----------------|----------|----------|----------|--------------|--------------|-------------|-------------|
| ENSRNOG00000008015 | Fos            | 7.620998 | 68.66133 | 5.52085  | -3.548598773 | 3.736500525  | 5.22E-05    | 2.02E-05    |
| ENSRNOG00000008180 | Lyn            | 4.745708 | 13.11201 | 5.011217 | -1.817862117 | 1.471531959  | 8.79E-09    | 2.07E-06    |
| ENSRNOG00000008182 | Htra3          | 2.261168 | 13.48312 | 6.255749 | -2.925768134 | 1.189277151  | 4.67E-14    | 0.000533445 |
| ENSRNOG00000008215 | Trim47         | 2.240002 | 12.48199 | 1.681511 | -2.838874188 | 2.985894027  | 8.39E-05    | 2.88E-05    |
| ENSRNOG00000008301 | Tagln2         | 10.23588 | 78.70447 | 18.44895 | -3.305006794 | 2.186714777  | 8.54E-12    | 2.99E-06    |
| ENSRNOG00000008409 | Myo1f          | 0.916019 | 5.722006 | 1.652493 | -2.998379529 | 1.878709199  | 1.59E-12    | 3.11E-06    |
| ENSRNOG00000008412 | Gprc5a         | 0.25088  | 3.189009 | 0.159437 | -4.024280483 | 4.423155936  | 0.000105738 | 1.23E-05    |
| ENSRNOG00000008676 | Emp1           | 4.166631 | 24.96561 | 6.963922 | -3.094079541 | 2.031687474  | 2.09E-06    | 0.00066642  |
| ENSRNOG00000008816 | Gpnmb          | 2.864476 | 56.9058  | 8.198007 | -4.679720052 | 2.89767592   | 1.52E-20    | 1.18E-08    |
| ENSRNOG00000009005 | Slco2a1        | 0.297874 | 5.647548 | 2.450181 | -4.566798032 | 1.310751966  | 2.60E-18    | 0.000152914 |
| ENSRNOG00000009088 | Txnrd1         | 17.62083 | 38.81866 | 17.23063 | -1.494945707 | 1.260935854  | 4.27E-05    | 0.000510442 |
| ENSRNOG00000009331 | Hck            | 0.653909 | 9.239087 | 1.588352 | -4.185742535 | 2.634171847  | 3.29E-16    | 1.93E-09    |
| ENSRNOG00000009740 | Slco1c1        | 22.60661 | 6.439062 | 15.67991 | 1.485176302  | -1.230283666 | 9.28E-06    | 0.000312821 |
| ENSRNOG00000009771 | Cdh10          | 18.7227  | 4.778206 | 10.1486  | 1.64906922   | -1.034900512 | 2.07E-07    | 0.001028614 |
| ENSRNOG00000009785 | Cdkn3          | 0.700305 | 3.440505 | 0.606781 | -2.666992743 | 2.60198622   | 0.001301698 | 0.000844173 |
| ENSRNOG00000009912 | Fgr            | 0.528973 | 6.681776 | 0.681878 | -4.025991567 | 3.391811466  | 4.82E-08    | 1.34E-06    |
| ENSRNOG00000010105 | S100a11        | 1.367061 | 45.57683 | 8.828029 | -5.398309958 | 2.466205598  | 2.84E-11    | 0.000180178 |
| ENSRNOG00000010107 | AABR07025295.1 | 3.222299 | 6.562578 | 3.005026 | -1.382556358 | 1.215558162  | 0.000168119 | 0.000854321 |
| ENSRNOG00000010165 | Tnfaip2        | 2.027178 | 11.14641 | 1.4248   | -2.822965854 | 3.054055798  | 1.66E-05    | 8.69E-06    |
| ENSRNOG00000010208 | Timp1          | 0.957506 | 442.1998 | 22.08231 | -9.209321788 | 4.437456684  | 2.63E-25    | 8.40E-08    |
| ENSRNOG00000010278 | Il6            | 0.213909 | 7.031325 | 0.029027 | -5.387772259 | 7.962320423  | 2.69E-05    | 9.99E-07    |
| ENSRNOG00000010319 | Lcp1           | 4.841377 | 30.33306 | 5.393326 | -3.010940452 | 2.58313625   | 1.25E-12    | 3.22E-10    |
| ENSRNOG00000010331 | Ctsb           | 130.243  | 409.2003 | 194.1616 | -2.003970147 | 1.161630104  | 5.13E-10    | 0.000311332 |
| ENSRNOG00000010362 | Anxa2          | 4.372696 | 119.0204 | 31.10409 | -5.118833407 | 2.028998031  | 1.79E-19    | 2.39E-05    |
| ENSRNOG00000010448 | Ptbp1          | 8.563962 | 33.13495 | 12.98766 | -2.423685969 | 1.468651178  | 8.11E-08    | 0.000370532 |
| ENSRNOG00000010478 | Serpina3n      | 0        | 124.5057 | 1.449908 | -19.14921542 | 6.55770923   | 9.15E-30    | 4.72E-08    |
| ENSRNOG00000010513 | Tfpi2          | 0.173038 | 5.593955 | 0.320218 | -5.37308354  | 4.217975264  | 9.25E-06    | 0.000149026 |
| ENSRNOG00000010524 | Cryab          | 10.71984 | 60.71192 | 23.27184 | -2.859113976 | 1.473991985  | 3.71E-09    | 0.000696523 |
| ENSRNOG00000010549 | Tspo           | 2.127155 | 39.45998 | 4.851274 | -2.744631298 | 2.258652041  | 5.65E-08    | 2.19E-06    |
| ENSRNOG00000010555 | LOC108348161   | 55.84243 | 13.52031 | 72.65161 | 1.717192319  | -2.363636205 | 1.01E-05    | 5.99E-10    |
| ENSRNOG00000010584 | Tmem123        | 4.226847 | 7.492365 | 3.242025 | -1.202731825 | 1.29144676   | 0.001697327 | 0.000538068 |
| ENSRNOG00000010645 | Lgals3         | 0.71145  | 75.84601 | 5.252358 | -7.084505909 | 3.954531273  | 7.60E-18    | 3.94E-09    |
| ENSRNOG00000010747 | Dap            | 2.673539 | 19.53538 | 9.674391 | -3.221256602 | 1.098555311  | 1.63E-18    | 0.000948885 |

|                    |          |          |          |          |              |             |             |             |
|--------------------|----------|----------|----------|----------|--------------|-------------|-------------|-------------|
| ENSRNOG00000010797 | Esm1     | 0.034277 | 3.932665 | 0.229977 | -7.131232503 | 4.192993762 | 3.92E-06    | 0.000103441 |
| ENSRNOG00000010799 | Noct     | 11.06685 | 22.52612 | 8.776729 | -1.387490213 | 1.452909559 | 0.001405334 | 0.000773083 |
| ENSRNOG00000010833 | Mthfd2   | 1.596542 | 7.983449 | 1.958006 | -2.680246374 | 2.117746088 | 6.17E-06    | 0.000135033 |
| ENSRNOG00000010897 | Nek6     | 12.75959 | 29.43223 | 11.11635 | -1.562626621 | 1.490913387 | 0.000261606 | 0.000305565 |
| ENSRNOG00000010994 | Has1     | 0.057518 | 1.617969 | 0.11537  | -5.144092305 | 3.910339548 | 0.001197384 | 0.000913552 |
| ENSRNOG00000011039 | Gch1     | 0.712278 | 4.05706  | 0.412075 | -2.878514681 | 3.40043158  | 2.53E-05    | 4.34E-06    |
| ENSRNOG00000011068 | Papss2   | 4.230072 | 7.832425 | 2.956418 | -1.22157368  | 1.548468788 | 0.007986291 | 0.00059002  |
| ENSRNOG00000011205 | Ccl3     | 0.721261 | 6.81109  | 0.667256 | -4.273852179 | 3.753491252 | 0.000608101 | 0.001069717 |
| ENSRNOG00000011250 | Inmt     | 0.24326  | 88.48914 | 4.992303 | -8.845004798 | 4.252233583 | 3.25E-16    | 1.31E-06    |
| ENSRNOG00000011316 | Fam167a  | 0.210575 | 1.12193  | 0.153201 | -2.779048796 | 2.962257925 | 0.000951666 | 0.000527476 |
| ENSRNOG00000011346 | Ehd2     | 2.458701 | 15.72391 | 4.370507 | -3.033773962 | 1.936485949 | 2.71E-09    | 5.08E-05    |
| ENSRNOG00000011406 | Ccl4     | 0.163353 | 6.445362 | 0.298289 | -5.620069895 | 4.491261726 | 0.000408269 | 0.000250172 |
| ENSRNOG00000011459 | Rhbdf2   | 0.106836 | 2.229352 | 0.44579  | -4.746153639 | 2.410559491 | 1.28E-08    | 9.68E-05    |
| ENSRNOG00000011559 | Cnn3     | 34.61831 | 116.9159 | 53.90931 | -2.111758139 | 1.202309878 | 3.38E-10    | 0.000202022 |
| ENSRNOG00000011668 | Nfil3    | 5.234342 | 17.47091 | 2.806244 | -2.101020289 | 2.732981254 | 0.000442229 | 7.21E-06    |
| ENSRNOG00000011774 | Fblim1   | 0.089056 | 2.925955 | 0.474664 | -5.324120402 | 2.72420381  | 5.37E-09    | 0.000294279 |
| ENSRNOG00000011821 | S100a4   | 1.784038 | 38.8114  | 4.727391 | -4.815806945 | 3.139850588 | 8.07E-10    | 4.69E-06    |
| ENSRNOG00000011824 | Trh      | 1.085563 | 50.22171 | 2.851163 | -5.909052236 | 4.244632108 | 4.33E-07    | 2.54E-05    |
| ENSRNOG00000011913 | Cp       | 2.973888 | 39.26166 | 9.964166 | -4.100838736 | 2.092005817 | 1.53E-17    | 3.23E-05    |
| ENSRNOG00000012049 | Sox7     | 0.262203 | 2.398926 | 0.148198 | -3.55182653  | 4.108570029 | 0.00143678  | 0.000246734 |
| ENSRNOG00000012094 | Ltbp2    | 0.192593 | 1.272918 | 0.225508 | -3.029990199 | 2.575867054 | 5.78E-05    | 0.00010129  |
| ENSRNOG00000012109 | Otulinl  | 2.127331 | 7.46352  | 2.224649 | -2.166852337 | 1.836529972 | 1.07E-05    | 0.000109215 |
| ENSRNOG00000012172 | Spi1     | 1.27039  | 9.155996 | 2.555433 | -3.207887123 | 1.931390647 | 1.06E-09    | 3.58E-05    |
| ENSRNOG00000012228 | Skap2    | 4.270305 | 9.968496 | 4.742764 | -1.568106457 | 1.144117585 | 7.37E-09    | 7.41E-06    |
| ENSRNOG00000012280 | Ptx3     | 0.369856 | 24.71193 | 0.297404 | -7.173918861 | 6.990866625 | 1.33E-07    | 4.30E-08    |
| ENSRNOG00000012543 | Mcm3     | 0.62015  | 4.462034 | 0.657252 | -3.200008201 | 2.850913049 | 3.18E-08    | 3.47E-07    |
| ENSRNOG00000012582 | Eif4ebp1 | 2.380309 | 24.16636 | 9.404328 | -3.699795656 | 1.453140588 | 1.52E-15    | 0.000517078 |
| ENSRNOG00000012630 | Rhoc     | 6.924728 | 54.3734  | 15.01873 | -3.412441017 | 2.027915799 | 3.82E-08    | 0.000168215 |
| ENSRNOG00000012698 | Chsy1    | 7.814113 | 16.35325 | 6.661317 | -1.423318948 | 1.382919139 | 0.000213044 | 0.000322353 |
| ENSRNOG00000012749 | C1qb     | 11.52996 | 122.3901 | 42.87784 | -3.756858752 | 1.596572335 | 2.51E-25    | 5.67E-06    |
| ENSRNOG00000012779 | Msr1     | 0.042674 | 2.929867 | 0.174641 | -6.448591516 | 4.167324203 | 7.50E-11    | 2.98E-08    |
| ENSRNOG00000012804 | C1qc     | 12.61939 | 103.5194 | 34.10633 | -3.387080978 | 1.686227081 | 4.36E-17    | 1.63E-05    |
| ENSRNOG00000012843 | Aspg     | 0.083593 | 5.587449 | 0.896792 | -6.416316077 | 2.735171109 | 6.27E-12    | 0.00012211  |

|                    |                 |          |          |          |              |              |             |             |
|--------------------|-----------------|----------|----------|----------|--------------|--------------|-------------|-------------|
| ENSRNOG00000012886 | Maff            | 0.857058 | 13.66811 | 0.558044 | -4.36197423  | 4.72034675   | 7.78E-07    | 2.54E-07    |
| ENSRNOG00000012956 | Tgm2            | 3.53073  | 18.04361 | 3.886497 | -2.710736675 | 2.309549695  | 1.72E-07    | 7.73E-06    |
| ENSRNOG00000013014 | Cyba            | 1.759723 | 35.09187 | 11.85053 | -4.667521294 | 1.651443991  | 7.24E-23    | 2.27E-05    |
| ENSRNOG00000013090 | Gadd45g         | 3.910041 | 66.75934 | 4.336882 | -4.455249112 | 4.045579144  | 6.80E-07    | 1.37E-06    |
| ENSRNOG00000013170 | LOC100360218    | 1.373065 | 8.100056 | 2.32787  | -2.917463729 | 1.892326838  | 1.59E-09    | 3.27E-05    |
| ENSRNOG00000013190 | Rnaset2         | 9.142836 | 45.79355 | 22.30657 | -2.675514516 | 1.118832801  | 1.48E-15    | 0.000236886 |
| ENSRNOG00000013220 | Arhgap45        | 1.464851 | 4.230634 | 1.799549 | -1.883183851 | 1.316570343  | 7.82E-08    | 0.000126551 |
| ENSRNOG00000013250 | NEWGENE_1310561 | 0.456579 | 0        | 3.393843 | 9.961139022  | -13.29342823 | 0.009699323 | 0.000343185 |
| ENSRNOG00000013526 | Rassf4          | 1.646903 | 6.748115 | 1.77122  | -2.392897502 | 2.018101386  | 3.40E-07    | 6.56E-06    |
| ENSRNOG00000013588 | Glr1            | 0.259575 | 0.886326 | 0.117941 | -2.132093834 | 2.986341319  | 0.003677116 | 0.001065985 |
| ENSRNOG00000013668 | Capg            | 1.357342 | 21.32273 | 2.024007 | -4.335366104 | 3.495588737  | 4.69E-13    | 1.73E-09    |
| ENSRNOG00000013747 | Sh3bp2          | 1.079681 | 4.955073 | 1.796216 | -2.554317792 | 1.554376715  | 3.05E-07    | 0.000600938 |
| ENSRNOG00000013791 | Enpp3           | 0.253197 | 5.581477 | 1.104141 | -4.814850167 | 2.429433182  | 3.50E-14    | 5.63E-06    |
| ENSRNOG00000013794 | Rbp1            | 2.467465 | 55.62567 | 23.09245 | -4.785110335 | 1.355481817  | 2.85E-23    | 0.000637519 |
| ENSRNOG00000013859 | Bpifa1          | 0.036514 | 3.421855 | 0.294675 | -6.793525603 | 3.563256993  | 0.000195973 | 0.000859566 |
| ENSRNOG00000013948 | Zc3hav1         | 1.649536 | 6.049909 | 2.016408 | -2.227150281 | 1.667694356  | 4.18E-08    | 5.25E-05    |
| ENSRNOG00000013967 | Blnk            | 1.560178 | 7.591719 | 3.585827 | -2.619738379 | 1.156003978  | 7.80E-15    | 0.000102489 |
| ENSRNOG00000013973 | Lcn2            | 0.283562 | 59.69008 | 2.729175 | -8.061928025 | 4.564053642  | 1.78E-23    | 2.29E-08    |
| ENSRNOG00000013987 | Sbno2           | 2.6556   | 11.64106 | 2.555928 | -2.652411255 | 2.290926775  | 4.96E-08    | 1.70E-06    |
| ENSRNOG00000014061 | Dusp5           | 1.152101 | 5.797188 | 1.030401 | -2.699340063 | 2.592017153  | 0.000396712 | 0.000477125 |
| ENSRNOG00000014117 | Hmox1           | 2.504441 | 244.3849 | 8.3048   | -6.973823701 | 4.988860807  | 3.05E-17    | 1.70E-09    |
| ENSRNOG00000014165 | Ssr1            | 14.43412 | 33.64343 | 15.9042  | -1.460507648 | 1.478187163  | 9.75E-05    | 4.80E-05    |
| ENSRNOG00000014241 | Ece1            | 7.317701 | 18.05024 | 8.397708 | -1.657788317 | 1.191560865  | 4.07E-06    | 0.00066681  |
| ENSRNOG00000014276 | Plce1           | 1.086783 | 2.453458 | 0.889123 | -1.564566664 | 1.583038647  | 4.78E-05    | 2.13E-05    |
| ENSRNOG00000014294 | Ptpn6           | 1.730136 | 14.23606 | 4.145036 | -3.389002583 | 1.861891253  | 2.04E-07    | 0.000916016 |
| ENSRNOG00000014320 | Inhba           | 2.631228 | 14.62491 | 2.527172 | -2.967592051 | 2.700424188  | 3.29E-05    | 0.00012636  |
| ENSRNOG00000014327 | Csrp3           | 0        | 0.465754 | 0        | -10.65460785 | 10.81272151  | 1.12E-05    | 4.96E-06    |
| ENSRNOG00000014336 | Mcm5            | 0.894161 | 4.22021  | 0.490172 | -2.582260699 | 3.187226462  | 4.59E-08    | 3.61E-09    |
| ENSRNOG00000014350 | Ccn1            | 2.093177 | 14.07514 | 1.290352 | -3.139083048 | 3.547900562  | 0.008668865 | 0.000772526 |
| ENSRNOG00000014378 | Il1r2           | 0.052713 | 3.078105 | 0.069558 | -6.226132866 | 5.565579247  | 1.65E-08    | 0.000277287 |
| ENSRNOG00000014398 | Scara5          | 0.253086 | 4.317555 | 0.409624 | -4.451578893 | 3.489514504  | 3.03E-12    | 7.16E-09    |
| ENSRNOG00000014426 | Lox             | 0.937802 | 16.08489 | 1.740624 | -4.452425572 | 3.304050743  | 7.48E-08    | 4.95E-05    |
| ENSRNOG00000014524 | S1pr3           | 1.742078 | 11.71233 | 1.089407 | -3.118397587 | 3.52448061   | 1.09E-05    | 8.89E-07    |

|                    |          |          |          |          |              |              |             |             |
|--------------------|----------|----------|----------|----------|--------------|--------------|-------------|-------------|
| ENSRNOG00000014532 | Lbp      | 0.024375 | 43.32438 | 2.209903 | -11.11605418 | 4.403203653  | 2.54E-12    | 5.77E-06    |
| ENSRNOG00000014741 | Kcnu1    | 0        | 0.013294 | 0        | -9.184551672 | 9.342503531  | 0.0004366   | 0.000263547 |
| ENSRNOG00000014751 | Ret      | 1.344932 | 4.952366 | 1.095742 | -2.236395759 | 2.267158249  | 3.72E-06    | 5.52E-06    |
| ENSRNOG00000014797 | Tmbim1   | 11.13309 | 72.14071 | 9.654638 | -3.022683437 | 3.035775035  | 3.23E-07    | 1.67E-07    |
| ENSRNOG00000014838 | Glipr2   | 0.658906 | 11.38545 | 1.418055 | -4.486047649 | 3.099276842  | 1.72E-10    | 9.08E-07    |
| ENSRNOG00000014840 | Gna14    | 1.937986 | 0.321106 | 0.983842 | 2.272800945  | -1.556592285 | 5.61E-08    | 0.000927573 |
| ENSRNOG00000014872 | Sec24d   | 2.965746 | 8.991937 | 3.766852 | -1.958956528 | 1.342074913  | 1.34E-07    | 0.000171153 |
| ENSRNOG00000014956 | Slc11a1  | 1.333819 | 7.588776 | 1.379132 | -2.953595112 | 2.673686801  | 3.25E-05    | 6.25E-05    |
| ENSRNOG00000014961 | Pdpm     | 3.411935 | 64.2425  | 11.98158 | -4.594562033 | 2.519217317  | 4.27E-16    | 5.12E-07    |
| ENSRNOG00000015055 | Scg2     | 37.33852 | 117.0663 | 41.08537 | -2.013371448 | 1.602645381  | 3.33E-05    | 0.000601531 |
| ENSRNOG00000015078 | Ifitm3   | 3.630484 | 108.2375 | 13.39761 | -5.255830788 | 3.11141165   | 1.65E-13    | 1.06E-06    |
| ENSRNOG00000015156 | Gal      | 0.489156 | 14.80557 | 1.548302 | -5.297375983 | 3.351238743  | 7.13E-07    | 9.28E-05    |
| ENSRNOG00000015160 | Gem      | 1.219949 | 15.9176  | 0.615492 | -4.070841641 | 4.788201865  | 5.67E-05    | 2.69E-06    |
| ENSRNOG00000015278 | Myl12a   | 14.92863 | 83.43625 | 32.29005 | -2.84114426  | 1.45879764   | 3.33E-12    | 0.0001918   |
| ENSRNOG00000015441 | Il4r     | 2.447049 | 8.893525 | 1.523419 | -2.220964108 | 2.646367027  | 4.12E-05    | 1.63E-06    |
| ENSRNOG00000015478 | Aicda    | 0        | 0.120682 | 0        | -9.038612902 | 9.196525879  | 0.000852289 | 0.000556718 |
| ENSRNOG00000015496 | Tpm4     | 7.392628 | 57.9292  | 13.74022 | -3.344534518 | 2.178001528  | 1.68E-11    | 6.60E-06    |
| ENSRNOG00000015727 | Loxl4    | 0.247052 | 2.888605 | 0.382691 | -3.911190492 | 3.009373399  | 4.21E-05    | 0.00074334  |
| ENSRNOG00000015845 | Fam129b  | 14.75817 | 57.44456 | 17.26795 | -2.32362855  | 1.828101823  | 6.03E-07    | 7.92E-05    |
| ENSRNOG00000015894 | Dock8    | 2.164904 | 5.007917 | 2.431852 | -1.677815598 | 1.23875603   | 2.34E-06    | 0.000221461 |
| ENSRNOG00000015992 | Ccl20    | 0.01375  | 9.012569 | 0.012082 | -9.556412843 | 9.475801448  | 8.38E-05    | 9.19E-05    |
| ENSRNOG00000016166 | Pdlim1   | 1.744295 | 8.355617 | 2.418079 | -2.617839071 | 1.88193365   | 3.56E-08    | 3.05E-05    |
| ENSRNOG00000016257 | Cotl1    | 12.54993 | 51.61692 | 22.88485 | -2.389236371 | 1.255289218  | 7.56E-16    | 8.96E-06    |
| ENSRNOG00000016281 | Col4a1   | 5.095123 | 12.41868 | 2.684978 | -1.653584878 | 2.306587705  | 0.001195929 | 1.27E-05    |
| ENSRNOG00000016316 | Mcm2     | 1.157679 | 6.05795  | 1.709846 | -2.740703271 | 1.910757186  | 6.72E-07    | 0.000164913 |
| ENSRNOG00000016413 | Pstpip1  | 0.675013 | 4.29719  | 1.197978 | -3.028546178 | 1.937343688  | 5.13E-08    | 9.10E-05    |
| ENSRNOG00000016496 | Ctsc     | 2.16876  | 17.26808 | 3.589933 | -3.347634099 | 2.3544812    | 9.45E-13    | 2.86E-07    |
| ENSRNOG00000016535 | Ccl22    | 0        | 0.20827  | 0        | -9.591469888 | 9.749474796  | 0.000331569 | 0.000188732 |
| ENSRNOG00000016831 | Serpinh1 | 13.60324 | 84.21868 | 32.02923 | -3.023162795 | 1.480410306  | 2.08E-10    | 0.000718042 |
| ENSRNOG00000017194 | Prdx1    | 79.86875 | 161.8462 | 79.05539 | -1.375556088 | 1.11626123   | 1.76E-05    | 0.000191662 |
| ENSRNOG00000017311 | Me3      | 15.22957 | 3.758803 | 18.90011 | 1.725045725  | -2.307977513 | 0.006003995 | 0.000257235 |
| ENSRNOG00000017386 | Il11     | 0.053704 | 11.94855 | 0.072922 | -8.109058832 | 7.444074535  | 3.27E-06    | 1.71E-05    |
| ENSRNOG00000017410 | Loxhd1   | 0.00719  | 0.142571 | 0.015874 | -4.650450033 | 3.263300678  | 0.001301143 | 0.000698472 |



|                    |                |          |          |          |              |              |             |             |
|--------------------|----------------|----------|----------|----------|--------------|--------------|-------------|-------------|
| ENSRNOG00000017453 | Ptpn2          | 4.541022 | 9.684762 | 4.116393 | -1.45006618  | 1.323199935  | 0.000300755 | 0.00083132  |
| ENSRNOG00000017469 | Anxa1          | 3.192162 | 26.19711 | 7.047588 | -3.387708324 | 1.982743225  | 4.01E-10    | 6.93E-05    |
| ENSRNOG00000017686 | Pi15           | 0.018271 | 1.252546 | 0.034408 | -6.472371833 | 5.268443923  | 0.000842326 | 0.00077142  |
| ENSRNOG00000017819 | Cd14           | 0.260558 | 37.32254 | 0.983262 | -7.477005064 | 5.341864366  | 2.50E-11    | 5.72E-08    |
| ENSRNOG00000017869 | Irf8           | 2.105355 | 8.616895 | 3.006827 | -2.387899517 | 1.599013694  | 5.85E-08    | 3.73E-05    |
| ENSRNOG00000017874 | Cd53           | 3.876073 | 12.62908 | 4.85629  | -2.065306142 | 1.463689153  | 1.65E-07    | 0.000122712 |
| ENSRNOG00000017980 | Itgal          | 0.372143 | 2.388393 | 0.352797 | -3.040257734 | 2.847080639  | 4.24E-07    | 3.03E-07    |
| ENSRNOG00000018087 | Vim            | 23.4748  | 299.7038 | 133.4181 | -4.021356174 | 1.252668916  | 1.10E-27    | 0.000277707 |
| ENSRNOG00000018109 | Clic4          | 42.37265 | 105.2371 | 43.79432 | -1.473275152 | 1.371315121  | 4.07E-05    | 0.000130551 |
| ENSRNOG00000018371 | Tubb6          | 1.457564 | 57.27127 | 3.944251 | -5.663067669 | 3.959301914  | 5.59E-14    | 9.55E-10    |
| ENSRNOG00000018450 | LOC100911440   | 24.08337 | 0        | 21.43169 | 15.82222613  | -16.11952811 | 7.33E-09    | 5.51E-09    |
| ENSRNOG00000018646 | Hbegf          | 2.419372 | 20.8403  | 1.747288 | -3.46691205  | 3.673029014  | 2.98E-06    | 4.81E-07    |
| ENSRNOG00000018659 | Csf1           | 2.555552 | 10.76107 | 3.138856 | -2.363713032 | 1.859905674  | 6.94E-07    | 4.18E-05    |
| ENSRNOG00000018681 | Nes            | 0.649706 | 5.562679 | 0.727707 | -3.437450266 | 3.031940718  | 5.78E-05    | 0.000191338 |
| ENSRNOG00000018752 | Clcf1          | 0.247876 | 3.073192 | 0.132887 | -3.977068455 | 4.620512463  | 0.000155145 | 2.61E-05    |
| ENSRNOG00000018911 | Pfkfb3         | 12.51025 | 30.83576 | 10.52771 | -1.657780474 | 1.631291187  | 0.000211322 | 0.00023908  |
| ENSRNOG00000019179 | Ggta1          | 1.425621 | 4.986177 | 1.425783 | -2.155050131 | 1.905250583  | 4.16E-05    | 0.00011212  |
| ENSRNOG00000019202 | PVR            | 1.12688  | 7.494073 | 1.259099 | -3.097926456 | 2.667829146  | 3.96E-06    | 3.57E-05    |
| ENSRNOG00000019203 | Eya2           | 0.547107 | 12.07847 | 4.564573 | -4.68331918  | 1.501831339  | 1.71E-23    | 0.00018042  |
| ENSRNOG00000019229 | Fbl            | 7.232945 | 36.09527 | 14.8841  | -2.677564875 | 1.365905919  | 1.91E-09    | 0.000678665 |
| ENSRNOG00000019293 | AABR07006025.1 | 0        | 1.784952 | 0        | -13.02909945 | 13.18729122  | 0.00051094  | 0.000385197 |
| ENSRNOG00000019358 | Esr1           | 0.220076 | 0.692301 | 0.162446 | -3.259971065 | 2.946897172  | 2.99E-11    | 3.23E-10    |
| ENSRNOG00000019387 | Ifi30          | 4.212025 | 24.67623 | 8.646421 | -2.903670069 | 1.597846954  | 4.78E-08    | 0.000943404 |
| ENSRNOG00000019440 | Kcnn4          | 0.213761 | 2.486953 | 0.356149 | -3.935054736 | 2.962547649  | 1.96E-05    | 4.97E-05    |
| ENSRNOG00000019549 | Akap12         | 4.124033 | 20.0887  | 7.600875 | -2.597759386 | 1.482887256  | 2.57E-08    | 0.000568114 |
| ENSRNOG00000019556 | Cd9            | 33.67803 | 81.33993 | 38.20927 | -1.630692382 | 1.174914649  | 2.62E-06    | 0.000472653 |
| ENSRNOG00000019661 | Gdf15          | 0.10246  | 4.79898  | 0.109583 | -5.827568167 | 5.480572075  | 0.000319825 | 6.12E-05    |
| ENSRNOG00000019728 | Itgad          | 3.507667 | 20.62849 | 3.023532 | -2.921936571 | 2.862271595  | 3.21E-11    | 3.41E-10    |
| ENSRNOG00000019742 | Stat3          | 15.78748 | 53.31467 | 15.66129 | -2.114522919 | 1.859714051  | 1.27E-07    | 2.99E-06    |
| ENSRNOG00000019780 | Sypl2          | 0.381365 | 4.075203 | 0.392672 | -3.778901227 | 3.474520407  | 8.30E-06    | 3.00E-05    |
| ENSRNOG00000019822 | Gadd45b        | 2.82069  | 39.1759  | 5.378538 | -4.105394552 | 2.93548338   | 2.77E-06    | 0.000213382 |
| ENSRNOG00000019892 | Lrrfip1        | 1.044725 | 3.907386 | 1.175998 | -2.26378659  | 1.822215108  | 2.51E-06    | 6.23E-05    |
| ENSRNOG00000020009 | Npas4          | 1.83686  | 14.46334 | 1.673649 | -3.350439011 | 3.210311812  | 0.000500232 | 0.000474366 |

|                    |                |          |          |          |              |              |             |             |
|--------------------|----------------|----------|----------|----------|--------------|--------------|-------------|-------------|
| ENSRNOG00000020136 | Tgm1           | 0.049958 | 1.220027 | 0.034757 | -4.979286598 | 5.219775504  | 0.00148578  | 3.87E-05    |
| ENSRNOG00000020182 | Mvp            | 2.526197 | 19.42303 | 5.352077 | -3.300913984 | 1.950078872  | 3.69E-14    | 2.44E-06    |
| ENSRNOG00000020298 | Bag3           | 1.328142 | 28.45447 | 5.226681 | -4.780886924 | 2.539919421  | 2.61E-19    | 5.15E-08    |
| ENSRNOG00000020300 | Lsp1           | 0.277078 | 21.89651 | 2.069675 | -6.670072308 | 3.502171121  | 2.01E-06    | 2.14E-11    |
| ENSRNOG00000020346 | Best1          | 2.558022 | 26.35548 | 13.1448  | -3.715448579 | 1.085496725  | 1.10E-22    | 0.001035233 |
| ENSRNOG00000020465 | Ripk3          | 0.266985 | 8.004988 | 0.531353 | -5.266004074 | 4.011638599  | 9.83E-10    | 4.88E-07    |
| ENSRNOG00000020478 | Camk4          | 34.04025 | 12.39459 | 27.39618 | 1.135856832  | -1.089200348 | 0.000358421 | 0.00020816  |
| ENSRNOG00000020552 | Fosl1          | 0.19638  | 8.41983  | 0.155086 | -5.768514067 | 5.858485586  | 4.76E-06    | 1.03E-06    |
| ENSRNOG00000020579 | Col7a1         | 0.26835  | 1.399167 | 0.185122 | -2.743905876 | 3.015455648  | 0.001081291 | 0.000330646 |
| ENSRNOG00000020652 | Tgfb1          | 2.475835 | 21.04701 | 5.635275 | -3.450725031 | 1.99652615   | 2.55E-11    | 2.44E-05    |
| ENSRNOG00000020657 | Shc1           | 3.423477 | 23.30589 | 6.123304 | -3.126707317 | 2.029050511  | 1.78E-08    | 0.000108662 |
| ENSRNOG00000020679 | Icam1          | 0.947553 | 9.018488 | 1.723042 | -3.611966544 | 2.483423689  | 2.99E-07    | 0.000164114 |
| ENSRNOG00000020684 | Vat1           | 13.84345 | 37.8095  | 15.92669 | -1.806819687 | 1.334057098  | 7.72E-06    | 0.000460993 |
| ENSRNOG00000020843 | Ftl1           | 204.3446 | 618.0615 | 307.2334 | -2.039217598 | 1.092648303  | 4.21E-09    | 0.001078514 |
| ENSRNOG00000020845 | Tyrobp         | 10.02541 | 63.59024 | 16.45948 | -3.020775119 | 2.036978599  | 9.83E-12    | 7.58E-07    |
| ENSRNOG00000020991 | Ms4a6a         | 0.502444 | 4.044795 | 0.751612 | -3.365911368 | 2.51927329   | 3.85E-06    | 0.000616463 |
| ENSRNOG00000021062 | Fxyd5          | 1.14309  | 39.90162 | 12.99048 | -5.147430543 | 1.649670841  | 2.66E-26    | 8.21E-05    |
| ENSRNOG00000021161 | Fermt3         | 1.407235 | 9.496798 | 2.240306 | -3.107995937 | 2.17500796   | 4.30E-09    | 6.34E-06    |
| ENSRNOG00000021199 | Fcgr1a         | 0.789346 | 6.816176 | 2.102038 | -3.433532026 | 1.789895329  | 2.71E-09    | 0.000356278 |
| ENSRNOG00000021817 | Irak2          | 2.888698 | 4.840281 | 1.762657 | -1.096316259 | 1.540395902  | 0.009172555 | 0.000284358 |
| ENSRNOG00000021833 | Myrfl          | 0        | 0.010265 | 0        | -8.788859674 | 8.946734097  | 0.000656276 | 0.00045371  |
| ENSRNOG00000021856 | Lat2           | 0.691034 | 4.360472 | 1.216191 | -2.900983317 | 1.901546011  | 9.65E-07    | 0.000332473 |
| ENSRNOG00000022859 | Trem1          | 0.028746 | 3.209523 | 0.079661 | -7.168391756 | 5.447664953  | 0.000631181 | 0.00072592  |
| ENSRNOG00000022937 | Bpifc          | 0        | 0.020499 | 0        | -9.244569317 | 9.402532493  | 0.000226602 | 0.000134938 |
| ENSRNOG00000023226 | S100a10        | 14.08326 | 113.0228 | 30.51468 | -3.363518275 | 1.981534573  | 2.22E-07    | 0.000956859 |
| ENSRNOG00000023257 | Adamts9        | 1.175631 | 2.819359 | 0.694291 | -1.631122869 | 2.119385548  | 0.00225974  | 0.000124258 |
| ENSRNOG00000023463 | Parp9          | 1.393235 | 6.671471 | 2.233466 | -2.613544068 | 1.663829955  | 1.33E-08    | 0.000158501 |
| ENSRNOG00000023546 | Hspb1          | 0.937441 | 384.8329 | 5.230747 | -9.047648983 | 6.308343016  | 2.90E-25    | 5.84E-14    |
| ENSRNOG00000023831 | AABR07027258.1 | 0.675478 | 0.039255 | 0.64675  | 3.715908708  | -3.850418089 | 0.000476524 | 0.000136549 |
| ENSRNOG00000023991 | Rab20          | 0.457218 | 3.536654 | 0.89007  | -3.31248783  | 2.079975475  | 1.85E-07    | 0.000169152 |
| ENSRNOG00000024028 | Spr1a          | 0.586123 | 16.47202 | 0.696689 | -5.157329175 | 4.653316212  | 7.50E-06    | 1.42E-05    |
| ENSRNOG00000024082 | Gldn           | 1.262543 | 5.074    | 0.325522 | -2.373498697 | 4.05629377   | 0.003142637 | 2.66E-06    |
| ENSRNOG00000024115 | C6             | 0.051758 | 3.947721 | 0.523637 | -5.527877666 | 2.594390983  | 2.11E-10    | 0.000228282 |

|                    |                |          |          |          |              |              |             |             |
|--------------------|----------------|----------|----------|----------|--------------|--------------|-------------|-------------|
| ENSRNOG00000024159 | Fcer1g         | 1.791748 | 41.3144  | 15.27227 | -4.873690911 | 1.518984633  | 2.03E-21    | 0.000219351 |
| ENSRNOG00000024382 | Fcgr3a         | 0.710608 | 19.25576 | 2.006926 | -5.064831912 | 3.348917983  | 4.03E-18    | 9.06E-11    |
| ENSRNOG00000024661 | Jpt2           | 3.76904  | 7.962443 | 3.226705 | -1.57217783  | 1.39509023   | 0.003081592 | 0.001000749 |
| ENSRNOG00000024882 | Pax1           | 0        | 0.466103 | 0        | -11.57236831 | 11.73052755  | 9.96E-05    | 5.55E-05    |
| ENSRNOG00000025273 | AABR07068728.1 | 1.492843 | 2.851868 | 1.239379 | -1.554866817 | 1.548288554  | 0.001592518 | 0.000738653 |
| ENSRNOG00000025679 | Stk40          | 7.737772 | 16.98036 | 6.35756  | -1.493254221 | 1.506627894  | 0.000184094 | 0.00013603  |
| ENSRNOG00000025764 | AC128848.1     | 4.90266  | 145.8231 | 17.10215 | -5.276603343 | 3.197798212  | 9.70E-14    | 6.80E-07    |
| ENSRNOG00000025889 | Gnas           | 0.049984 | 1.950771 | 0.351614 | -5.615963667 | 2.495772812  | 0.00229466  | 0.001053268 |
| ENSRNOG00000026235 | Hk3            | 0        | 3.269474 | 0.043378 | -14.35393895 | 6.272273054  | 4.19E-15    | 1.32E-07    |
| ENSRNOG00000026293 | Jun            | 15.38989 | 74.16426 | 22.45585 | -2.627969371 | 1.815310211  | 2.07E-07    | 0.000145288 |
| ENSRNOG00000026647 | Cxcl16         | 1.884715 | 28.01064 | 5.155461 | -4.255166217 | 2.545387827  | 6.79E-09    | 0.000132331 |
| ENSRNOG00000027024 | Rgs16          | 2.545694 | 10.52784 | 2.77818  | -2.396463248 | 2.008527074  | 7.98E-05    | 0.000606198 |
| ENSRNOG00000027655 | Clec4b2        | 0        | 0.083845 | 0        | -10.05829678 | 10.21636278  | 0.001441042 | 0.000992228 |
| ENSRNOG00000027855 | Fcar           | 0        | 0.114132 | 0        | -10.95499966 | 11.11312933  | 0.000506076 | 0.000310074 |
| ENSRNOG00000028043 | Cxcl3          | 0        | 2.492454 | 0        | -13.7778087  | 13.93600745  | 5.63E-07    | 3.59E-07    |
| ENSRNOG00000028801 | Gsap           | 0.228209 | 1.672304 | 0.339159 | -3.237094277 | 2.394990847  | 2.17E-07    | 2.56E-05    |
| ENSRNOG00000028872 | Rai14          | 2.259399 | 6.383142 | 2.145981 | -2.073832808 | 1.702033602  | 2.42E-05    | 0.000666831 |
| ENSRNOG00000028896 | A2m            | 0.978109 | 6.0023   | 1.631977 | -2.964679192 | 1.978201486  | 2.03E-11    | 0.000326074 |
| ENSRNOG00000029662 | Wdfy4          | 0.322388 | 1.185388 | 0.393349 | -2.232175297 | 1.681646105  | 3.69E-08    | 4.88E-05    |
| ENSRNOG00000029663 | Il1rapl1       | 23.77588 | 4.759091 | 9.257577 | 2.497280161  | -1.256356005 | 1.29E-17    | 0.000208603 |
| ENSRNOG00000029682 | Clic1          | 4.956499 | 73.36555 | 13.11167 | -4.251682577 | 2.579894083  | 2.62E-15    | 1.50E-07    |
| ENSRNOG00000030118 | Msn            | 7.291458 | 48.70567 | 8.978667 | -3.134467681 | 2.589885267  | 4.57E-11    | 3.02E-08    |
| ENSRNOG00000030187 | Mmp12          | 0.024765 | 0.470023 | 0        | -4.538090687 | 11.41225541  | 0.004933893 | 1.07E-07    |
| ENSRNOG00000030269 | Atp2b2         | 169.1962 | 33.98462 | 82.94539 | 1.983455887  | -1.222938581 | 7.17E-07    | 0.000978143 |
| ENSRNOG00000030387 | Kng1           | 0        | 20.42917 | 1.619589 | -17.11614604 | 3.768105278  | 1.52E-30    | 6.55E-05    |
| ENSRNOG00000030712 | RT1-A2         | 5.198186 | 23.88233 | 4.036674 | -2.450930071 | 2.292879075  | 8.30E-06    | 7.59E-06    |
| ENSRNOG00000031167 | AABR07054319.1 | 11.01173 | 40.2109  | 7.899016 | -2.231660037 | 2.443980591  | 1.54E-05    | 1.98E-06    |
| ENSRNOG00000031312 | Tnfrsf1a       | 4.18839  | 21.04828 | 7.312869 | -2.686457504 | 1.614403496  | 1.11E-08    | 0.000231176 |
| ENSRNOG00000031743 | Gbp2           | 0.958116 | 10.18079 | 1.568946 | -3.769070372 | 2.788108146  | 2.35E-12    | 2.30E-08    |
| ENSRNOG00000032436 | Tmod3          | 7.163538 | 20.98177 | 9.685147 | -1.904248017 | 1.199028851  | 6.59E-08    | 0.000652232 |
| ENSRNOG00000032788 | Dysf           | 0.137615 | 0.707272 | 0.174636 | -2.717584335 | 2.117141486  | 1.15E-05    | 0.000242962 |
| ENSRNOG00000033134 | Mef2c          | 98.9244  | 31.81715 | 73.14643 | 1.597317627  | -1.391683453 | 0.000242092 | 5.18E-05    |
| ENSRNOG00000033173 | Fam71e2        | 0        | 0.096428 | 0        | -9.602957218 | 9.760968392  | 0.000379316 | 0.000219972 |

|                    |                |          |          |          |              |              |             |             |
|--------------------|----------------|----------|----------|----------|--------------|--------------|-------------|-------------|
| ENSRNOG00000033192 | Osmr           | 0.694789 | 5.478572 | 0.437317 | -3.343622259 | 3.748508476  | 1.58E-06    | 1.39E-07    |
| ENSRNOG00000033256 | LOC691141      | 0.286216 | 2.320983 | 0.222973 | -3.352856974 | 3.550909615  | 0.000437102 | 2.81E-05    |
| ENSRNOG00000033433 | Csrnp1         | 2.692824 | 19.25093 | 2.513694 | -3.205483602 | 3.038348511  | 3.93E-06    | 8.30E-06    |
| ENSRNOG00000033527 | Pappal         | 0.036646 | 0.792187 | 0.058441 | -4.779058116 | 3.823764589  | 7.49E-07    | 1.14E-06    |
| ENSRNOG00000033528 | Tll1           | 0.793498 | 3.297938 | 1.022015 | -2.418851583 | 1.781515906  | 4.52E-07    | 0.000130323 |
| ENSRNOG00000033570 | Arhgap8        | 0.133604 | 1.730837 | 0.210559 | -4.063742116 | 3.131743296  | 8.90E-08    | 8.56E-06    |
| ENSRNOG00000036689 | P4hb           | 38.32118 | 94.03623 | 38.99733 | -1.652561834 | 1.358449754  | 8.13E-06    | 0.000198433 |
| ENSRNOG00000036703 | Itgax          | 0.068111 | 2.151548 | 0.089413 | -5.327677706 | 4.693489687  | 6.24E-06    | 8.64E-06    |
| ENSRNOG00000037113 | Slfn2          | 0.744691 | 8.556132 | 1.626527 | -3.911342089 | 2.494545004  | 7.02E-07    | 0.000406361 |
| ENSRNOG00000037409 | Scimp          | 0.010122 | 5.959309 | 0.084035 | -9.396614384 | 6.312915996  | 1.66E-07    | 4.73E-08    |
| ENSRNOG00000037865 | Hormad2        | 0.012353 | 0.326052 | 0.020423 | -5.083008198 | 4.080702817  | 0.007639034 | 0.000311092 |
| ENSRNOG00000038047 | Mt1            | 2.469941 | 72.60313 | 7.835678 | -5.207893168 | 3.31355947   | 3.46E-07    | 0.000265568 |
| ENSRNOG00000038132 | Vsig4          | 0        | 0.612401 | 0.011591 | -13.21148654 | 5.80791095   | 5.18E-09    | 0.000508843 |
| ENSRNOG00000038722 | Tlr1           | 0.110653 | 1.836326 | 0.195178 | -4.410261754 | 3.321453676  | 4.81E-07    | 3.86E-05    |
| ENSRNOG00000038835 | Cd86           | 0.336591 | 4.114932 | 0.713988 | -4.095714551 | 2.540506718  | 1.64E-10    | 1.17E-05    |
| ENSRNOG00000038881 | Hcls1          | 0.948257 | 10.70062 | 2.654881 | -3.853782969 | 2.097428589  | 6.46E-16    | 4.25E-07    |
| ENSRNOG00000038894 | AABR07072096.1 | 0        | 0.067753 | 0        | -10.27327506 | 10.43136046  | 0.001071286 | 0.00073415  |
| ENSRNOG00000039197 | LOC108348074   | 0.178517 | 1.074338 | 0.085739 | -2.958935189 | 3.7397238    | 0.000144612 | 1.30E-05    |
| ENSRNOG00000039464 | Tmem229a       | 13.58933 | 1.225353 | 6.009898 | 3.107926556  | -2.201104507 | 1.43E-07    | 0.000320978 |
| ENSRNOG00000039744 | RT1-CE4        | 5.54775  | 21.79389 | 4.797531 | -2.577781045 | 2.472390623  | 1.10E-06    | 5.35E-06    |
| ENSRNOG00000039902 | Lbh            | 9.662174 | 33.75073 | 13.49507 | -2.165580231 | 1.408153009  | 7.71E-07    | 0.000896847 |
| ENSRNOG00000040287 | Cyp1b1         | 1.120726 | 31.6127  | 6.625007 | -4.950826125 | 2.426468875  | 1.40E-10    | 0.000228542 |
| ENSRNOG00000042080 | Il31ra         | 0        | 0.05237  | 0        | -10.62103125 | 10.7791468   | 0.000979541 | 0.000651516 |
| ENSRNOG00000042838 | Junb           | 19.20289 | 90.67205 | 21.66985 | -2.607685118 | 2.162285588  | 5.83E-05    | 0.000564091 |
| ENSRNOG00000043044 | Cnn2           | 3.519062 | 26.77889 | 6.410974 | -3.28839609  | 2.159160146  | 4.55E-08    | 0.000111392 |
| ENSRNOG00000043098 | Mt2A           | 45.27849 | 887.2805 | 165.8694 | -4.654842549 | 2.515980831  | 1.44E-20    | 1.85E-07    |
| ENSRNOG00000043099 | Ddx21          | 8.45446  | 16.55246 | 7.06283  | -1.328121893 | 1.315867451  | 0.001075111 | 0.000982369 |
| ENSRNOG00000043416 | Bcl3           | 0.081795 | 4.656189 | 0.340365 | -6.17603881  | 3.879041508  | 3.58E-11    | 2.55E-06    |
| ENSRNOG00000043451 | Spp1           | 0.940327 | 159.0937 | 5.296464 | -7.771252652 | 5.034327324  | 3.11E-13    | 1.02E-07    |
| ENSRNOG00000045654 | LOC108348108   | 0.59121  | 87.79134 | 1.742069 | -7.511401276 | 5.747110217  | 1.88E-26    | 8.52E-21    |
| ENSRNOG00000045772 | LOC100911545   | 0.79885  | 6.798044 | 1.843166 | -3.429215443 | 1.975548119  | 5.75E-07    | 0.000323171 |
| ENSRNOG00000046327 | Rbpj           | 11.35128 | 18.25731 | 7.680785 | -1.046949454 | 1.338308951  | 0.008006152 | 0.000833942 |
| ENSRNOG00000046452 | Fcgr2b         | 0.867572 | 25.72374 | 3.666424 | -4.840600126 | 2.800781058  | 8.25E-13    | 4.96E-08    |

|                    |                |          |          |          |              |              |             |             |
|--------------------|----------------|----------|----------|----------|--------------|--------------|-------------|-------------|
| ENSRNOG00000046667 | Fosb           | 2.785585 | 20.05339 | 1.986194 | -3.221953685 | 3.417780061  | 8.64E-05    | 3.58E-05    |
| ENSRNOG00000046699 | Slpi           | 0        | 13.97157 | 0.086192 | -14.15031752 | 7.369452535  | 4.13E-11    | 2.17E-07    |
| ENSRNOG00000046834 | C3             | 1.720631 | 7.617387 | 2.662066 | -2.476234244 | 1.593484729  | 4.65E-08    | 0.000334376 |
| ENSRNOG00000047606 | Bcl2a1         | 0.673481 | 8.84699  | 1.544205 | -4.091547246 | 2.619502348  | 3.35E-06    | 0.000368693 |
| ENSRNOG00000048273 | Apod           | 58.30635 | 187.5799 | 86.43906 | -2.047776937 | 1.204697828  | 8.22E-08    | 0.000739499 |
| ENSRNOG00000048771 | RGD1559482     | 0.141085 | 6.349358 | 0.520711 | -5.713185597 | 3.653721918  | 1.24E-08    | 4.69E-05    |
| ENSRNOG00000049075 | Fabp5          | 12.26215 | 92.85364 | 29.6537  | -3.281209182 | 1.739342007  | 3.68E-12    | 6.54E-05    |
| ENSRNOG00000049236 | Myh9l1         | 7.877046 | 23.37855 | 10.31366 | -1.924868953 | 1.267848929  | 4.58E-08    | 0.000240075 |
| ENSRNOG00000049491 | RT1-DMb        | 2.930397 | 18.01454 | 5.16009  | -3.050476278 | 1.885966942  | 3.42E-07    | 0.000226948 |
| ENSRNOG00000049517 | Tnfaip3        | 2.452905 | 9.647608 | 2.14648  | -2.340498265 | 2.265679082  | 0.000843695 | 0.00095549  |
| ENSRNOG00000049700 | LOC100909857   | 0        | 0.594849 | 0        | -12.89113522 | 13.04932428  | 1.62E-10    | 3.10E-11    |
| ENSRNOG00000049723 | LOC102547963   | 0.054879 | 1.00305  | 0.029755 | -5.787881827 | 6.404724609  | 6.61E-08    | 1.48E-05    |
| ENSRNOG00000049895 | LOC100910143   | 1.571436 | 0        | 0.626161 | 14.14802053  | -13.26458184 | 1.43E-05    | 0.000334266 |
| ENSRNOG00000050024 | Ms4a4a         | 0.428787 | 5.463753 | 1.678145 | -3.989249963 | 1.810738095  | 6.61E-10    | 0.000919342 |
| ENSRNOG00000050183 | RT1-CE1        | 0.005913 | 0.277647 | 0.008555 | -6.491957645 | 5.380784148  | 0.000920541 | 0.000549545 |
| ENSRNOG00000050190 | Eng            | 2.929166 | 14.38062 | 2.659953 | -2.659999369 | 2.53727147   | 0.000401662 | 0.000511808 |
| ENSRNOG00000050251 | MGC105649      | 0.045701 | 4.084249 | 0.148366 | -6.726105342 | 4.877313572  | 4.46E-06    | 0.000127262 |
| ENSRNOG00000050404 | Pmepa1         | 9.483079 | 41.38459 | 11.68179 | -2.488543662 | 1.917308493  | 2.14E-06    | 0.000181562 |
| ENSRNOG00000050430 | Vav1           | 0.796524 | 4.434298 | 1.656272 | -2.73836424  | 1.901456776  | 3.09E-06    | 0.000660257 |
| ENSRNOG00000050473 | Rps27l         | 6.156573 | 40.06076 | 12.12936 | -3.065361963 | 1.812026853  | 7.85E-09    | 8.84E-05    |
| ENSRNOG00000050647 | Hspa1b         | 0.621388 | 83.67021 | 1.648656 | -7.419896118 | 5.756239871  | 4.63E-29    | 5.85E-23    |
| ENSRNOG00000050697 | Ctsz           | 5.71596  | 61.05381 | 13.95718 | -3.776891068 | 2.220093224  | 2.60E-18    | 1.74E-08    |
| ENSRNOG00000050794 | Pdlim4         | 13.13989 | 65.97019 | 27.51494 | -2.680593335 | 1.344507084  | 4.98E-15    | 9.70E-06    |
| ENSRNOG00000050869 | Cebpd          | 3.419129 | 47.91339 | 4.786426 | -4.161495821 | 3.419156016  | 2.15E-07    | 5.78E-06    |
| ENSRNOG00000050997 | Ifrd1          | 21.82406 | 50.86547 | 17.02076 | -1.582097256 | 1.671670867  | 0.000123631 | 4.65E-05    |
| ENSRNOG00000051534 | AC132720.2     | 0.010407 | 3.727865 | 0.304107 | -8.522318747 | 3.692032289  | 7.37E-07    | 0.000696152 |
| ENSRNOG00000051624 | Hspe1          | 6.782828 | 22.67628 | 10.92427 | -2.081391659 | 1.139883701  | 9.64E-09    | 0.000600859 |
| ENSRNOG00000052015 | AABR07042937.1 | 11.52213 | 0        | 4.999251 | 13.31194005  | -12.5121214  | 1.52E-06    | 9.94E-06    |
| ENSRNOG00000052038 | Haus8          | 1.185192 | 11.49673 | 2.074776 | -3.626879786 | 2.570910157  | 2.02E-07    | 5.46E-05    |
| ENSRNOG00000052064 | Parvg          | 1.352046 | 4.72899  | 1.444187 | -2.163437728 | 1.799682058  | 0.000233388 | 0.001053906 |
| ENSRNOG00000053272 | Chi3l1         | 18.33767 | 80.91339 | 32.17635 | -2.494283201 | 1.416854242  | 2.57E-12    | 2.48E-05    |
| ENSRNOG00000053550 | Itga1          | 2.300609 | 6.155681 | 2.027516 | -1.710758137 | 1.675803022  | 0.000505978 | 0.001044163 |
| ENSRNOG00000054251 | Clec7a         | 0.085588 | 4.914524 | 0.312783 | -5.774352254 | 3.960156457  | 3.13E-07    | 2.04E-05    |

|                    |              |          |          |          |              |              |             |             |
|--------------------|--------------|----------|----------|----------|--------------|--------------|-------------|-------------|
| ENSRNOG00000054336 | Majin        | 2.79439  | 0.053571 | 1.954893 | 5.90818545   | -5.665259921 | 1.22E-06    | 7.82E-05    |
| ENSRNOG00000054860 | Clec12a      | 0.234731 | 8.556716 | 1.135528 | -4.894149615 | 2.804377105  | 8.86E-08    | 1.87E-05    |
| ENSRNOG00000054890 | Flna         | 6.36798  | 24.56351 | 8.745198 | -2.30645076  | 1.58100051   | 4.88E-08    | 0.000168989 |
| ENSRNOG00000055512 | Hist1h2bk    | 4.407655 | 36.80677 | 12.26789 | -3.41692079  | 1.660564179  | 1.72E-08    | 0.000972725 |
| ENSRNOG00000055672 | Gpx2         | 0.107582 | 18.28133 | 1.516168 | -7.724716304 | 3.692438828  | 3.07E-08    | 1.35E-05    |
| ENSRNOG00000056219 | Olr1         | 0.322753 | 4.01472  | 0.196003 | -4.00910948  | 4.451848244  | 1.67E-06    | 8.06E-08    |
| ENSRNOG00000056786 | Piezo1       | 1.197411 | 4.720097 | 1.164073 | -2.337641133 | 2.10884665   | 8.84E-07    | 9.91E-06    |
| ENSRNOG00000057058 | Cd300a       | 1.526278 | 5.024736 | 1.789528 | -2.080408454 | 1.581161005  | 4.95E-07    | 2.95E-05    |
| ENSRNOG00000057153 | Pla1a        | 1.075494 | 8.159561 | 0.950447 | -3.284068904 | 3.199152853  | 2.37E-07    | 1.83E-06    |
| ENSRNOG00000057315 | Kcnh3        | 35.2072  | 9.17961  | 23.73249 | 1.625264493  | -1.320596455 | 1.31E-05    | 0.000260102 |
| ENSRNOG00000057451 | Itga5        | 0.551813 | 5.938237 | 0.660906 | -3.792311655 | 3.261709342  | 5.28E-07    | 7.48E-06    |
| ENSRNOG00000057832 | Rnf125       | 0.28451  | 1.780322 | 0.277211 | -3.002544261 | 2.779282032  | 0.00015133  | 0.000161433 |
| ENSRNOG00000058111 | Itga2        | 0        | 0.429336 | 0        | -14.4222076  | 14.58040992  | 8.15E-14    | 2.00E-14    |
| ENSRNOG00000058186 | Errfi1       | 14.46718 | 44.51974 | 11.16666 | -1.943921564 | 2.076850284  | 0.000166679 | 2.42E-05    |
| ENSRNOG00000058388 | Zfp36        | 2.323521 | 28.91342 | 3.30928  | -4.006913109 | 3.222908982  | 2.13E-06    | 4.48E-05    |
| ENSRNOG00000058568 | Dhrs9        | 0.495239 | 7.921897 | 0.679257 | -4.356924007 | 3.644219515  | 9.22E-08    | 6.34E-06    |
| ENSRNOG00000058645 | Tnc          | 2.912365 | 8.330635 | 2.288058 | -1.88356621  | 1.960769374  | 0.000447606 | 0.00022377  |
| ENSRNOG00000058697 | LOC103690319 | 0        | 0.140089 | 0        | -8.292967285 | 8.450696044  | 0.001347545 | 0.000975786 |
| ENSRNOG00000059381 | Mrps6        | 12.41603 | 60.54116 | 25.32223 | -2.634185845 | 1.341706757  | 6.68E-12    | 0.000162375 |
| ENSRNOG00000059461 | B4galt1      | 1.275067 | 6.013722 | 2.142111 | -2.592378661 | 1.576792966  | 1.58E-08    | 0.000422052 |
| ENSRNOG00000059463 | Slc39a1      | 18.96004 | 61.18251 | 25.75459 | -2.043248984 | 1.332584373  | 6.98E-08    | 0.000211383 |
| ENSRNOG00000059947 | Sdc1         | 0.325687 | 9.789851 | 0.61786  | -5.277154114 | 4.086692221  | 4.08E-09    | 3.12E-07    |
| ENSRNOG00000060338 | Lipc         | 0        | 0.025304 | 0        | -10.67663626 | 10.83475299  | 0.000534539 | 0.00034017  |
| ENSRNOG00000060381 | Col15a1      | 0.26772  | 1.075742 | 0.226933 | -2.366151607 | 2.337283376  | 0.000447622 | 8.65E-05    |
| ENSRNOG00000061595 | Tfec         | 0.01856  | 0.992863 | 0.136501 | -6.066412075 | 2.955944505  | 0.000559717 | 1.20E-05    |
| ENSRNOG00000061857 | Mgst2        | 0.862539 | 8.955455 | 1.996012 | -3.73618403  | 2.256662095  | 2.86E-08    | 0.000477124 |
| XLOC_057615        | XLOC_057615  | 12.965   | 0.602261 | 2.621154 | 4.287052498  | -2.327389119 | 3.93E-16    | 0.00046927  |
| XLOC_145157        | XLOC_145157  | 9.551363 | 18.50738 | 6.366644 | -1.302084574 | 1.617359348  | 0.002737782 | 0.000269032 |

**Table S3.** Differentially expressed miRNAs associated with the effect of 20(R)-ginsenoside Rg3 on stroke recovery.

| miRNA_ID         | Sham     | Model       | Rg3      | log2FoldChange |              | Pvalue        |              |
|------------------|----------|-------------|----------|----------------|--------------|---------------|--------------|
|                  |          |             |          | Sham_vs_Model  | Model_vs_Rg3 | Sham_vs_Model | Model_vs_Rg3 |
| novel_62         | 769.4574 | 4538.814185 | 727.5542 | -2.56023       | 3.042989     | 0.002637388   | 6.32E-08     |
| rno-let-7g-3p    | 11.85656 | 97.7889871  | 9.366126 | -3.02734       | 3.80309      | 6.00E-05      | 2.11E-06     |
| rno-miR-128-2-5p | 232.1279 | 52.94668035 | 143.6822 | 2.097066       | -1.05391     | 2.44E-07      | 0.024106     |
| rno-miR-130a-5p  | 3.910058 | 26.7645146  | 13.3146  | -2.72846       | 1.384491     | 0.001033366   | 0.043599     |
| rno-miR-130b-5p  | 27.15453 | 11.88339705 | 40.27568 | 1.170238       | -1.37061     | 0.041246653   | 0.014911     |
| rno-miR-142-3p   | 6.100142 | 186.5200239 | 54.87105 | -4.92151       | 2.167438     | 1.85E-15      | 0.001033     |
| rno-miR-147      | 1.144834 | 13.08606324 | 2.216147 | -3.47744       | 2.922856     | 0.001772933   | 0.00168      |
| rno-miR-155-5p   | 9.550528 | 79.04928925 | 35.08951 | -3.06028       | 1.552389     | 1.64E-07      | 0.001951     |
| rno-miR-1949     | 0.645657 | 10.66992636 | 0.689063 | -4.08423       | 4.33143      | 0.009855444   | 0.001932     |
| rno-miR-19a-3p   | 6.33792  | 26.20781728 | 13.35822 | -2.04448       | 1.364118     | 0.003185878   | 0.020989     |
| rno-miR-204-3p   | 66.56293 | 9.866032793 | 33.87694 | 2.666021       | -1.35104     | 9.81E-07      | 0.036346     |
| rno-miR-21-3p    | 0        | 19.50004994 | 2.555326 | -6.87379       | 3.364795     | 1.12E-05      | 0.002454     |
| rno-miR-21-5p    | 23588.52 | 255201.8563 | 149404.2 | -3.43549       | 1.15347      | 6.75E-60      | 1.16E-05     |
| rno-miR-223-3p   | 10.90986 | 69.8025031  | 41.82603 | -2.66428       | 1.120901     | 4.65E-05      | 0.040755     |
| rno-miR-301a-3p  | 10.13306 | 51.54964243 | 21.98678 | -2.32817       | 1.620959     | 9.92E-06      | 0.002977     |
| rno-miR-337-3p   | 3.85419  | 34.10199951 | 18.15699 | -3.13404       | 1.286058     | 1.08E-05      | 0.026014     |
| rno-miR-3590-3p  | 3.910058 | 26.7645146  | 13.3146  | -2.72846       | 1.384491     | 0.001033366   | 0.043599     |
| rno-miR-362-3p   | 5.450961 | 73.46944012 | 39.16325 | -3.72272       | 1.301165     | 2.02E-09      | 0.030373     |
| rno-miR-449a-5p  | 7.372047 | 29.32395453 | 6.643843 | -1.98333       | 2.522148     | 0.023687632   | 0.001061     |
| rno-miR-503-5p   | 32.05873 | 119.0095406 | 71.15599 | -1.88901       | 1.131556     | 0.00022377    | 0.016252     |
| rno-miR-543-3p   | 5856.427 | 2026.355905 | 5579.826 | 1.53011        | -1.1056      | 0.000975786   | 0.011269     |
| rno-miR-671      | 657.7029 | 126.1747237 | 344.4962 | 2.367292       | -1.08035     | 0.000162375   | 0.01763      |
